1 **Title: Nutritional status and fecundity are synchronised by muscular exophoresis**

2

3 **Authors:** Michał Turek<sup>1,2\*</sup>, Małgorzata Piechota<sup>3†</sup>, Nilesh Shanmugam<sup>3†</sup>, Marta Niklewicz<sup>3</sup>,

4 Konrad Kowalski<sup>3</sup>, Agnieszka Chacińska<sup>1,2</sup>, Wojciech Pokrzywa<sup>3\*</sup>

5

6 **Affiliations:**

7 *<sup>1</sup>Laboratory of Mitochondrial Biogenesis, Centre of New Technologies, University of*

8 *Warsaw, Warsaw, Poland.*

9 *<sup>2</sup>ReMedy International Research Agenda Unit, University of Warsaw, Warsaw, Poland.*

10 *<sup>3</sup>Laboratory of Protein Metabolism in Development and Aging, International Institute of*

11 *Molecular and Cell Biology, Warsaw, Poland.*

12 \* Co-corresponding authors

13 † These authors contributed equally to this work

14 Correspondence should be directed to:

15 WP: [wpokrzywa@iimcb.gov.pl](mailto:wpokrzywa@iimcb.gov.pl)

16 MT: [m.turek@cent.uw.edu.pl](mailto:m.turek@cent.uw.edu.pl)

17

18 **Abstract**

19 Organismal functionality and reproduction depend on metabolic rewiring and balanced energy  
20 resources. However, the crosstalk between organismal homeostasis and fecundity, and the  
21 associated paracrine signaling mechanisms are still poorly understood. Using  
22 the *Caenorhabditis elegans* we discovered that secretory vesicles termed exophers, attributed  
23 in neurons to the removal of neurotoxic components, are released by body wall muscles to  
24 support embryonic growth. We found that exopher formation (exopheresis) is a non-cell  
25 autonomous process regulated by egg formation in the uterus. Our data suggest that exophers  
26 serve as transporters for muscle-generated yolk proteins used for nourishing and improving the  
27 growth rate of the next generation. We propose that the primary role of muscular exopheresis  
28 is to stimulate the reproductive capacity, thereby influencing the adaptation of worm  
29 populations to the current environmental conditions.

30

31 **Main**

32 The proper cellular function relies on the removal of unwanted contents by proteolysis or  
33 degradation mainly via the ubiquitin-proteasome system (UPS) and autophagy<sup>1</sup>. Recently a  
34 complementary mechanism was described in *Caenorhabditis elegans*. Under proteotoxic  
35 stress, worms' neurons can remove protein aggregates and damaged mitochondria via large  
36 membrane-surrounded vesicles called exophers<sup>2</sup>. Waste excretion by exophers in mouse  
37 neuronal HT22 cells under oxidative stress conditions was also reported<sup>3</sup>. This extrusion  
38 phenomenon could constitute a significant but still poorly explored metabolic waste  
39 management pathway. However, not only neurons can remove cellular content via exophers.  
40 Using worms expressing fluorescent reporters in the body wall muscle cells (BWM), we  
41 identified muscle-derived exophers; these reporters allow simultaneous tracking of  
42 proteasomes, closely associated with proteostasis, and mitochondria, which can be extruded in

43 neuronal tissue<sup>2</sup>. Muscular exophers are filled with proteasomes (both 19S and 20S subunits)  
44 (**Fig. 1a**), and approximately 12% of them contain mitochondria (**Extended Data Fig. 1**).  
45 Muscular exophers are generally more abundant and prominent (with diameters ranging from  
46 2 to 15  $\mu\text{m}$ ) (**Fig. 1b**) than neuronal exophers<sup>2</sup>, and the majority are generated by adult  
47 hermaphrodite mid-body muscles (**Fig. 1c**). Exophers are formed in the muscle cell and  
48 expelled outside via a pinching off mechanism (**Fig. 1d**). Some exophers that bud off remain  
49 connected with the extruding BWM via a thin but elastic tube that permits continued transfer  
50 of a large amount of cellular material into the extruded vesicle (**Fig. 1e, Supplementary Video**  
51 **1**), similar to neuronal exophers<sup>2</sup>. Proteostasis impairment significantly increases neuronal  
52 exopher output<sup>2,3</sup>. In contrast, the number of muscular exophers did not change in response to  
53 depletion of the central proteostasis transcription factor HSF-1 (via *hsf-1* RNAi) or to heat  
54 stress, and the number increased slightly under conditions of oxidative stress (**Fig. 1f-g**). These  
55 observations suggest that proteostasis regulation might be not the core function of muscle  
56 exopheresis.

57 Next, we assessed the number of exophers at different time points of the *C.*  
58 *elegans* hermaphrodite life cycle. Reminiscent of neuronal exophers, muscular exophers are  
59 not produced during the larval stages, and their maximum level is reached around the second  
60 and third days of hermaphrodite adulthood (**Fig. 2a**). Because this time point coincides with  
61 the worm's maximum reproductive rate, we wondered if reproduction could influence exopher  
62 formation. To examine this possibility, we followed exopheresis in males. For the first three  
63 days of adulthood, males did not produce any exophers (**Fig. 2a**). This finding suggests that  
64 germ cell maturation in the reproductive system of hermaphrodite worms, the process of oocyte  
65 fertilization, or embryonic development might regulate muscle exopheresis.

66 To test these hypotheses, we took advantage of a thermosensitive *C. elegans fem-1* mutant  
67 strain that does not produce viable sperm at the restrictive temperature of 25 °C. At the  
68 permissive temperature of 15 °C, some animals can reproduce as well as wild type  
69 hermaphrodites, whereas the rest of the population is sterile<sup>4</sup>. The offspring-producing *fem-*  
70 *1* mutant animals grown at 15 °C generated a high number of muscular exophers. Contrarily,  
71 animals raised either at 15 °C or 25 °C that were unable to fertilize oocytes did not activate  
72 muscular exopheresis (**Fig. 2b-c**), indicating that neither the presence of the female gonad nor  
73 the temperature itself were sufficient to trigger exopher release. Notably, hermaphrodites  
74 sterilized via fluorodeoxyuridine (FUdR) treatment<sup>5</sup> extruded no exophers or only a few per  
75 animal (**Fig. 2d**), suggesting that the occurrence of developing embryos could indeed stimulate  
76 muscular exopheresis. We also found that FUdR-treated hermaphrodites often contained  
77 exopher-like structures in their BWM (**Fig. 2e**, middle and right panels). Interestingly, we  
78 detected objects resembling non-extruded exophers in the BWM of males (**Fig. 2e**, left panel),  
79 indicating that males are devoid of mechanisms triggering their expulsion.

80 The above results suggest that the occurrence of developing embryos could induce muscular  
81 exopheresis. Consistently, we observed a positive correlation between the number of exophers  
82 released and the number of eggs present in the worm uterus (**Fig. 3a**). To further explore this  
83 link, we depleted the mRNA of genes responsible for various processes associated with egg-  
84 laying. RNAi depletion of the G-protein signalling gene *goa-1* leads to hyperactive egg-laying  
85 behaviour, resulting in the presence of fewer early-stage eggs within the uterus<sup>6</sup>. As expected,  
86 *goa-1* knockdown caused a significant drop in the level of exopher release. In contrast, the egg-  
87 laying defects induced by *egl-1* and *egl-4* RNAi, which lead to egg retention in the uterus<sup>7</sup>,  
88 increased exopher formation by muscle cells (**Fig. 3b**). In the absence of food, worms halt egg-  
89 laying and retain fertilized eggs in the uterus<sup>8,9</sup>; therefore, we anticipated that worms would  
90 generate more exophers when experiencing a food shortage. Indeed, the accumulation of

91 developing eggs in the uterus caused by the transfer of adult worms to food-free plates resulted  
92 in a significant increase in muscle exopher secretion (**Fig. 3c**). Next, we tested whether worm  
93 embryos could directly induce exopher production. We exposed young adult worms to extract  
94 from developing eggs from the wild-type strain (**Fig. 3d**). Intriguingly, worms placed in contact  
95 with material derived from lysed embryos increased exopheresis by approximately 20% (**Fig.**  
96 **3e**). This observation suggests that molecules that diffuse from embryos *in utero* are  
97 responsible for exopheresis induction. Finally, we decided to confirm that even in the face of  
98 disturbed proteostasis specifically in the BWM, a signal associated with the developing  
99 embryos in the uterus would be the primary regulator of muscular exopheresis. To this end, we  
100 knocked down the myosin-directed chaperone UNC-45, which results in severe defects in the  
101 organization of thick muscle filaments, as well as embryonic defects in cytokinesis and polarity  
102 determination<sup>10-12</sup>. We initiated *unc-45* depletion in L4 larvae, which first leads to a disturbance  
103 of proteostasis in BWM, and later, in young gravid adults, to inhibition of embryonic  
104 development. Despite the dysfunction of a myosin-chaperone network in muscle cells, which  
105 was indicated by complete paralysis of worms, we observed a dramatic inhibition of exopher  
106 formation (**Fig. 3f**), highlighting the predominant role of maturing eggs in muscular  
107 exopheresis.

108 Production of a single exopher involves the elimination of a substantial amount of the muscle  
109 cell content. The high number of exophers produced during the *C. elegans* lifespan by BWM  
110 leads to the removal of a relatively significant portion of cellular mass by a single tissue. We  
111 hypothesized that this process should have substantial effects on worm muscle functionality  
112 and healthspan. To this end, we selected three types of worms from the synchronized  
113 population of gravid adults based on the number of extruded exophers, i.e., few (< 2), many (>  
114 20), and control (6-8) animals (**Fig. 4a**), and analyzed their locomotory behaviour. In neurons,  
115 exophers production is correlated with improved cell functionality; however, worms with

116 intensified exopheresis did not show enhanced mobility (**Fig. 4b, Extended Data Fig. 2**). On  
117 the contrary, these animals displayed a reduction in exploratory behaviour (**Fig. 4c-d**).  
118 Furthermore, the active use of muscular exopheresis was correlated with prolonged lifespan,  
119 revealing a long-term beneficial effect (**Fig. 4e**).

120 Because, developing embryos stimulate exopher release from the mother BWM, we next  
121 wondered whether this process benefited the offspring. Previous work showed that neuronal  
122 exopher content can be transported through the worm body to reach distant scavenger cells  
123 (coelomocytes)<sup>2</sup>. Moreover, muscle-specific transcriptomic analysis revealed the presence of  
124 significant levels of vitellogenin mRNAs (i.e., *vit-2*, *-5* and *-6*)<sup>13</sup>. Therefore, we hypothesized  
125 that the components of the yolk from BWM are transported through exophers to be used as a  
126 source of raw materials for maturing eggs. To address this possibility, we used RNAi  
127 knockdown of *vit-1* (a vitellogenin-coding gene) to reduce the level of the principal yolk  
128 protein<sup>14</sup> and investigated whether it led to an increase in exopher biogenesis as a possible  
129 compensatory mechanism. Indeed, the number of accumulated muscle-released exophers  
130 nearly doubled in response to yolk protein depletion (**Fig. 4f**). Moreover, intensification of  
131 exopheresis in the mother increased the amount of vitellogenin in developing eggs (**Fig. 4g**).

132 Next, we followed the localization of vitellogenin-2 (VIT-2) fused to GFP and muscle exopher  
133 markers in the hermaphrodite. We detected the presence of VIT-2::GFP in the BWM of day-2  
134 adult worms, as well as a significant accumulation in many muscle exophers (**Fig. 4h,**  
135 **Extended Data Fig. 3**). These results suggest that exophers can mediate the transport of  
136 additional portions of muscle-produced vitellogenin, which is ultimately deposited in oocytes  
137 from the body cavity<sup>15</sup>. Finally, we followed the growth of the progeny of hermaphrodites  
138 exhibiting different levels of exopheresis (**Fig. 4a**). We found that offspring from mothers with  
139 a high number of muscle-released exophers (which showed no change in egg-laying behaviour)

140 grew faster (**Fig. 4i**). This is in line with a previous reports showing that yolk-reach eggs  
141 support animals post-embryonic survival and development<sup>14,16,17</sup>.

## 142 **Discussion**

143 We have shown here that muscular exopheresis in *C. elegans* represents a previously  
144 uncharacterized nutrient management program associated with nourishing the next generation  
145 of worms. The availability of food for mothers affects the number of developing eggs in the  
146 uterus and the developmental stage at which the eggs are laid<sup>18</sup>. Activation of exopheresis  
147 occurs with the first appearance of developing eggs in the uterus and intensifies in situations  
148 of environmental food depletion. Likewise, disturbance of yolk synthesis increases exopher  
149 biosynthesis. Consequently, in mothers with highly active exopheresis, the volume of yolk  
150 content in eggs increased. Our results show that yolk protein produced in BWM is transferred  
151 to exophers and ultimately delivered to oocytes. Therefore, the use of exophers for the transport  
152 of vitellogenin represents an elegant mechanism by which remote cells can help to enrich the  
153 nourishment of developing embryos. This process leads to the production of larvae that are  
154 better prepared to thrive in the current environmental conditions. Thus, muscular exopheresis  
155 is likely an adaptive mechanism that affects the dynamics of population growth. The impact of  
156 exopheresis on early reproduction may be particularly crucial for wild worms, given the  
157 significantly shortened life expectancy observed under more natural conditions<sup>19</sup>.

158 Neuronal exopher formation occurs in higher animals<sup>3</sup>. In addition, yolk protein can be  
159 synthesized in the muscles of oviparous animals like zebrafish<sup>20</sup>, and is supplemented from the  
160 mother to the intraovarian embryo in viviparous animals<sup>21</sup>. Hence, it is tempting to speculate  
161 that the role of muscular exopheresis in supporting progeny development could be evolutionarily  
162 conserved. However, the exact mechanisms by which oocyte fertilization and subsequent  
163 embryonic development initiate exopher formation and how this exopheresis is executed at the  
164 molecular level require further studies.

165

## 166 References

- 167 1 Dikic, I. Proteasomal and Autophagic Degradation Systems. *Annu Rev Biochem* **86**,  
168 193-224, doi:10.1146/annurev-biochem-061516-044908 (2017).
- 169 2 Melentijevic, I. *et al.* C. elegans neurons jettison protein aggregates and mitochondria  
170 under neurotoxic stress. *Nature* **542**, 367-371, doi:10.1038/nature21362 (2017).
- 171 3 Hualin, F., Jilong, L., Peng, D., Weilin, J. & Daxiang, C. (bioRxiv, 2019).
- 172 4 Nelson, G. A., Lew, K. K. & Ward, S. Intersex, a temperature-sensitive mutant of the  
173 nematode *Caenorhabditis elegans*. *Dev Biol* **66**, 386-409, doi:10.1016/0012-  
174 1606(78)90247-6 (1978).
- 175 5 Hosono, R. Sterilization and growth inhibition of *Caenorhabditis elegans* by 5-  
176 fluorodeoxyuridine. *Exp Gerontol* **13**, 369-374, doi:10.1016/0531-5565(78)90047-5  
177 (1978).
- 178 6 Bany, I. A., Dong, M. Q. & Koelle, M. R. Genetic and cellular basis for acetylcholine  
179 inhibition of *Caenorhabditis elegans* egg-laying behavior. *J Neurosci* **23**, 8060-8069  
180 (2003).
- 181 7 Hirose, T. *et al.* Cyclic GMP-dependent protein kinase EGL-4 controls body size and  
182 lifespan in *C. elegans*. *Development* **130**, 1089-1099, doi:10.1242/dev.00330 (2003).
- 183 8 Daniels, S. A., Ailion, M., Thomas, J. H. & Sengupta, P. egl-4 acts through a  
184 transforming growth factor-beta/SMAD pathway in *Caenorhabditis elegans* to regulate  
185 multiple neuronal circuits in response to sensory cues. *Genetics* **156**, 123-141 (2000).
- 186 9 Dong, M. Q., Chase, D., Patikoglou, G. A. & Koelle, M. R. Multiple RGS proteins alter  
187 neural G protein signaling to allow *C. elegans* to rapidly change behavior when fed.  
188 *Genes Dev* **14**, 2003-2014 (2000).
- 189 10 Kachur, T., Ao, W., Berger, J. & Pilgrim, D. Maternal UNC-45 is involved in  
190 cytokinesis and colocalizes with non-muscle myosin in the early *Caenorhabditis*  
191 *elegans* embryo. *J Cell Sci* **117**, 5313-5321, doi:10.1242/jcs.01389 (2004).
- 192 11 Gazda, L. *et al.* The myosin chaperone UNC-45 is organized in tandem modules to  
193 support myofilament formation in *C. elegans*. *Cell* **152**, 183-195,  
194 doi:10.1016/j.cell.2012.12.025 (2013).
- 195 12 Pokrzywa, W. & Hoppe, T. Chaperoning myosin assembly in muscle formation and  
196 aging. *Worm* **2**, e25644, doi:10.4161/worm.25644 (2013).
- 197 13 Blazie, S. M. *et al.* Comparative RNA-Seq analysis reveals pervasive tissue-specific  
198 alternative polyadenylation in *Caenorhabditis elegans* intestine and muscles. *BMC Biol*  
199 **13**, 4, doi:10.1186/s12915-015-0116-6 (2015).
- 200 14 Perez, M. F. & Lehner, B. Vitellogenins - Yolk Gene Function and Regulation in. *Front*  
201 *Physiol* **10**, 1067, doi:10.3389/fphys.2019.01067 (2019).
- 202 15 Hall, D. H. *et al.* Ultrastructural features of the adult hermaphrodite gonad of  
203 *Caenorhabditis elegans*: relations between the germ line and soma. *Dev Biol* **212**, 101-  
204 123, doi:10.1006/dbio.1999.9356 (1999).
- 205 16 Van Rompay, L., Borghgraef, C., Beets, I., Caers, J. & Temmerman, L. New genetic  
206 regulators question relevance of abundant yolk protein production in *C. elegans*. *Sci*  
207 *Rep* **5**, 16381, doi:10.1038/srep16381 (2015).
- 208 17 Perez, M. F., Francesconi, M., Hidalgo-Carcedo, C. & Lehner, B. Maternal age  
209 generates phenotypic variation in *Caenorhabditis elegans*. *Nature* **552**, 106-109,  
210 doi:10.1038/nature25012 (2017).



- 211 18 Muschiol, D., Schroeder, F. & Traunspurger, W. Life cycle and population growth rate  
212 of *Caenorhabditis elegans* studied by a new method. *BMC Ecol* **9**, 14,  
213 doi:10.1186/1472-6785-9-14 (2009).
- 214 19 Van Voorhies, W. A., Fuchs, J. & Thomas, S. The longevity of *Caenorhabditis elegans*  
215 in soil. *Biol Lett* **1**, 247-249, doi:10.1098/rsbl.2004.0278 (2005).
- 216 20 Zhong, L. *et al.* Distribution of vitellogenin in zebrafish (*Danio rerio*) tissues for  
217 biomarker analysis. *Aquat Toxicol* **149**, 1-7, doi:10.1016/j.aquatox.2014.01.022 (2014).
- 218 21 Iida, A. *et al.* Mother-to-embryo vitellogenin transport in a viviparous teleost. *Proc Natl*  
219 *Acad Sci U S A* **116**, 22359-22365, doi:10.1073/pnas.1913012116 (2019).
- 220

221 **Figures**

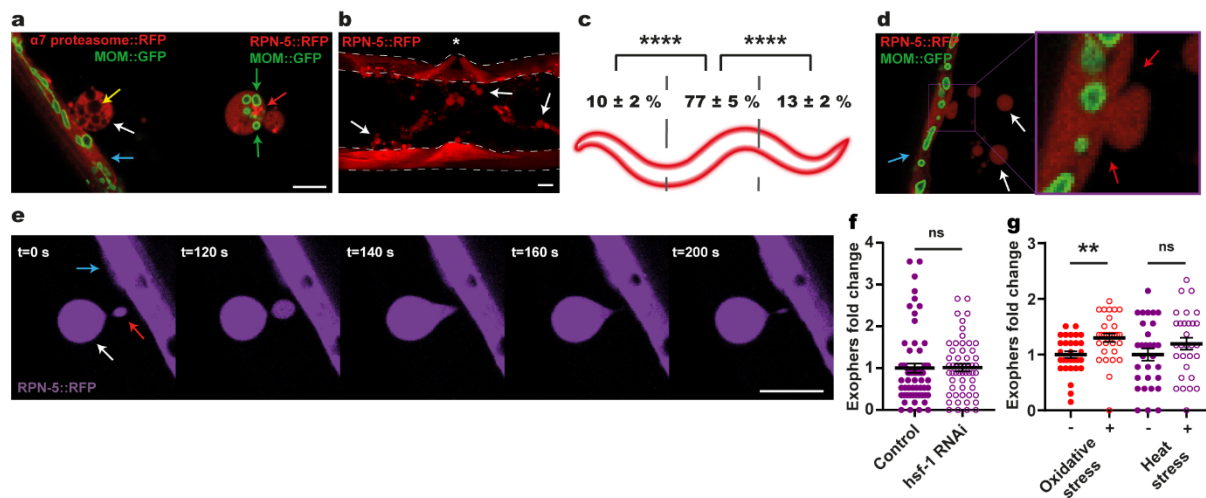

222

223 **Figure 1. *C. elegans* muscles expel cellular content via exophers.** **a**, Muscular exophers  
 224 contain organelles and large protein complexes. Arrows: white – exopher, blue – muscle cell,  
 225 green – mitochondria, red – proteasome foci, yellow – unidentified vesicle. MOM –  
 226 mitochondrial outer membrane. **b**, BMW actively releases significant amounts of exopher. The  
 227 image shows the middle part of the worm's body with muscles marked with dashed lines.  
 228 Arrows indicate representative exophers, and the asterisk indicates the position of the vulva. **c**,  
 229 Production of muscular exophers is not evenly distributed across all muscle cells. The highest  
 230 number of exophers is produced by the muscles adjacent to the vulva. n = 46 animals; three  
 231 biological replicates. **d**, Exophers are formed via a pinching-off mechanism. Arrows: white –  
 232 exopher, blue – muscle cell, red – distorted muscle cell membrane during exopher formation.  
 233 **e**, Exophers may remain connected to the sending BWM cells via thin elastic tubes that allow  
 234 further transfer of cellular material. Arrows: white – exopher, blue – muscle cell, red – cellular  
 235 material transferred to exopher via elastic tube. **f**, Proteostasis disruption by *hsf-1* knockdown  
 236 does not increase exopher production. n = 60 and 55 animals, two biological replicates. **g**,  
 237 Proteostasis induced via oxidative stress but not via heat stress increases exopher production.  
 238 n = 30 animals; three biological replicates.  
 239 Scale bars are 10  $\mu$ m. Data are shown as mean  $\pm$  SEM. ns – not significant, \*\* P < 0.01, \*\*\*\*  
 240 P < 0.0001; **c**, **f**, **g**, two-tailed Welch's t-test.

241

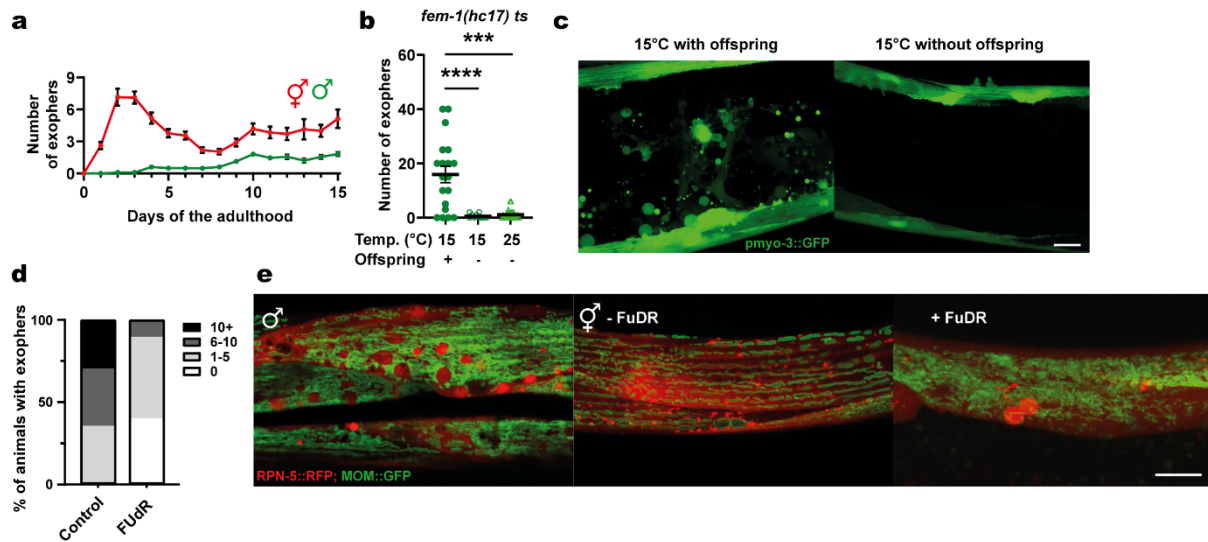

242

243 **Figure 2. Exopher formation is sex-specific and fertility-dependent.** **a**, The highest number  
 244 of exophers is produced during the hermaphrodite reproductive period and in aging animals.  
 245 Males do not produce exophers during the first days of adulthood and begin to generate a small  
 246 number of exophers later in life. Starting  $n = 90$  hermaphrodites and 150 males; three biological  
 247 replicates. **b**, Feminized hermaphrodites of thermosensitive a *fem-1* mutant strain do not  
 248 produce exophers regardless of growth temperature.  $n = 10 - 26$  animals; one biological  
 249 replicate. **c**, Representative images of the middle part of the worm body in panel **b**. **d**,  
 250 Hermaphrodites sterilized via FUdR treatment produce no exophers or only a few per animal.  
 251  $n = 17$  and 20 animals; two biological replicates. **e**, Males and sterile hermaphrodites (via FUdR  
 252 treatment) show the formation of spherical structures in the BWM that resemble mature  
 253 exophers. MOM – mitochondrial outer membrane.

254 Scale bars are 10  $\mu\text{m}$ . Data are shown as mean  $\pm$  SEM; \*\*\*  $P < 0.001$ , \*\*\*\*  $P < 0.0001$ ; **b**,  
 255 two-tailed Welch's t-test.

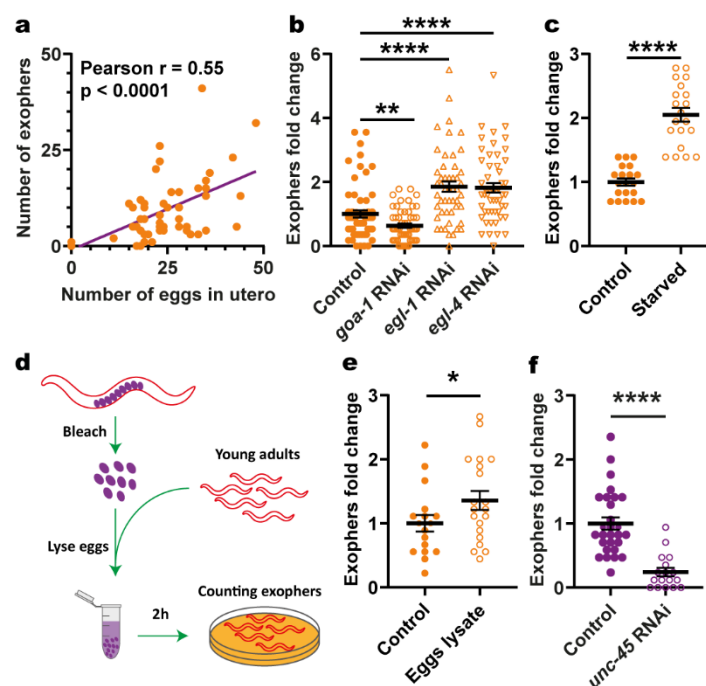

256

257 **Figure 3. Muscular exopheresis is a non-cell autonomous process regulated by *in utero***

258 **developing embryos. a**, The number of produced exophers positively correlates with the

259 number of *in utero* embryos. The violet line is a linear regression line, and each orange point

260 represents one animal. All animals were 1 - 3 days old; n = 54 animals; three biological

261 replicates. **b**, RNAi knockdown of genes regulating the egg laying rate and their presence in

262 the uterus influences exopher production. n = 50 - 60 animals; two biological replicates. **c**, Egg

263 retention in the uterus caused by starvation increases exopher production. n = 20 animals; one

264 biological replicate. **d**, Schematic representation of the experimental setup for investigating the

265 influence of egg lysate on exopher production. **e**, Exposure of young-adult worms to embryo-

266 derived substances increases exopher production. n = 17 and 20 animals; one biological

267 replicate. **f**, RNAi knockdown of the essential muscular co-chaperone *unc-45* reduces exopher

268 production. n = 28 and 17 animals; two biological replicates.

269 Data are shown as mean  $\pm$  SEM; \* P < 0.05, \*\* P < 0.01, \*\*\*\* P < 0.0001; **b, c, f**, two-tailed

270 Welch's t-test; **e**, one-tailed Welch's t-test.

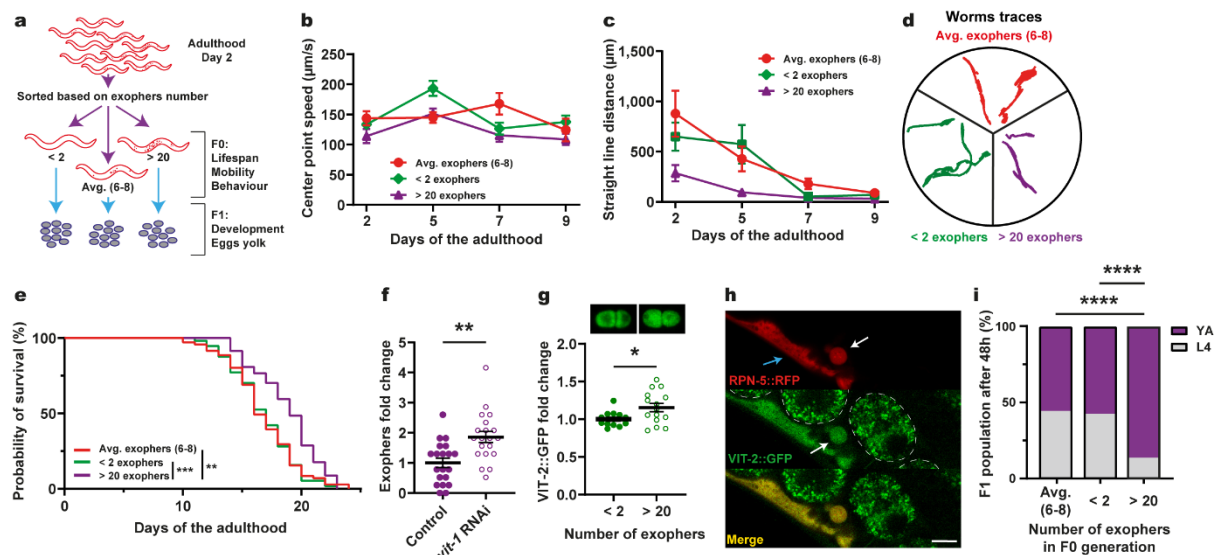

271

272

273

274

275

276

277

278

279

280

281

282

283

284

285

286

287

288

289

290

291

**Figure 4. Worms with overactive muscular exophoresis live longer and their offspring develop faster.** **a**, Schematic representation of the experimental setup for investigating the influence of overactive exophoresis on F0 and F1 worm generation. **b**, Exopher production does not improve muscle functionality.  $n = 11 - 38$ ; three biological replicates. **c-d**, Animals with overactive exophoresis have reduced exploratory behaviour presented as a reduction in straight line distance travelled (**c**) and by representative worms traces on the plate (**d**).  $n = 11 - 34$ ; three biological replicates. **e**, Production of a high number of exophers increases lifespan.  $n = 63 - 88$  animals; three biological replicates. **f**, RNAi knockdown of the egg yolk precursor protein VIT-1 increases the number of muscular exophers.  $n = 20$  animals; two biological replicates. **g**, Embryos from hermaphrodite mothers that produce a high number of exophers contain more egg yolk precursor protein VIT-2. Representative images of embryos with VIT-2::GFP levels from mothers with different exophoresis activity are show above the graph.  $n = 15$  and  $14$  eggs, five and six biological replicates (animals). **h**, Muscle-produced VIT-2 is released from muscles via exophers. The image shows the midbody of worms expressing the proteasome subunit RPN-5 tagged with RFP in BWM and VIT-2::GFP endogenous expression. Arrows: white – exopher, blue – muscle cell. Dashed lines mark eggs present in the uterus. Scale bar is  $10 \mu\text{m}$ . **i**, Offspring of worms with overactive exophoresis develop faster. YA – young adult stage, L4 – last larval stage.  $n = 317 - 372$  animals; two biological replicates. Data are shown as mean  $\pm$  SEM. \*  $P < 0.05$ , \*\*  $P < 0.01$ , \*\*\*  $P < 0.001$ , \*\*\*\*  $P < 0.0001$ ; **e**, Log-rank (Mantel-Cox) test; **f**, **g**, two-tailed Welch’s t-test; **i**, Fisher’s exact test.

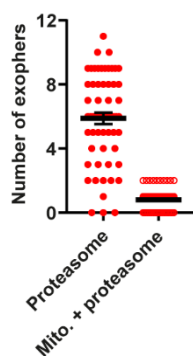

292

293 **Extended Data Figure 1. Small fraction of muscular exophers contain mitochondria.** n =  
294 60; six biological replicates. Data are shown as mean  $\pm$  SEM.

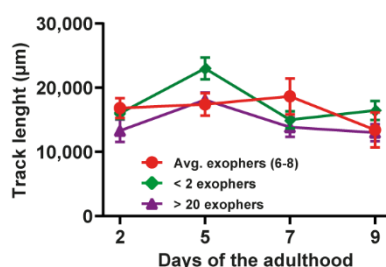

295

296 **Extended Data Figure 2. Active exophoresis affects worm mobility.** Graph shows the track  
297 lengths of animals exhibiting different exophoresis activities. n = 11 - 38; three biological  
298 replicates. Data are shown as mean  $\pm$  SEM.

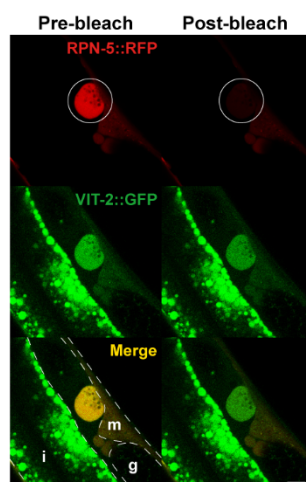

299

300 **Extended Data Figure 3. Exophers contain muscle-produced vitellogenin.** Images show  
301 the formation of an exopher filled with the proteasome and vitellogenin. Images were captured  
302 before and after RPN-5::RFP photobleaching, confirming that the high signal from VIT-  
303 2::GFP in forming exophers is not an imaging artefact. The white circle marks the area that

304 was bleached using a 555 nm laser and the position of developing exopher. Dashed lines mark  
305 different tissue borders: m – muscle, i – intestine, g – gonad. Scale bar is 10  $\mu$ m.

## 306 **Methods**

### 307 **Data reporting**

308 No statistical methods were used to predetermine the sample size. The experiments were not  
309 randomized. The investigators were not blinded to allocation during experiments and outcome  
310 assessment except for lifespan measurement and exploratory behaviour experiments.

311

### 312 **Worm maintenance and strains**

313 Worms were maintained on Nematode Growing Medium (NGM) plates seeded with  
314 OP50 *Escherichia coli* bacteria at 20 °C unless otherwise stated<sup>1</sup>. A list of all strains used in  
315 the study, together with the information in which experiments they were used is provided in  
316 Supplementary Table 1.

317

### 318 **Generation of plasmids**

319 All constructs were cloned using the SLiCE method<sup>2</sup> and were sequenced for verification.  
320 Construct for the expression of GFP on the mitochondrial outer membrane in the worm's body  
321 wall muscles was prepared as follows. First, destination vector pMT26 containing pCG150  
322 vector backbone with the *myo-3* promoter and *unc-54* 3'UTR sequences separated by KspAI  
323 restriction site was made. Next, codon-optimized sequences<sup>3</sup> for GFP, linker containing attB5  
324 sequence, and the sequence of the first 55 amino acids from TOMM-20 protein<sup>4</sup> (from a  
325 plasmid that was synthesized for this study) were PCR amplified and inserted into linearized  
326 pMT26 vector. To generate construct for expression of RPN-5 or PAS-7 tagged with RFP in  
327 worm's body wall muscles, sequences encoding respective proteins were PCR amplified and  
328 inserted into pMT26 linearized destination vector. As a template for the *rpn-5*-coding  
329 sequence, we used plasmid bearing codon-optimized *rpn-5* cDNA with 3 artificial introns,  
330 which was synthesized for this study. The sequence of *pas-7* gene was directly amplified from



331 N2 worms genomic DNA, and the sequence of RFP (wrmScarlet) was amplified from pSEM89  
332 plasmid<sup>5</sup>.

333

### 334 **Transgenic strains generation**

335 Worms transgenic strains were created by microparticle bombardment using *unc-*  
336 *119(ed3)* rescue as a selection marker<sup>6</sup>. After phenotypic confirmation of successful plasmid  
337 insertion, transformants were backcrossed two times against N2 strain to remove the *unc-*  
338 *119(ed3)* background.

339

### 340 **Scoring exophers and Microscopy**

341 For scoring of exophers, a confocal microscope or a stereomicroscope was used.

342 When using the confocal microscope, animals were transferred onto 3 % agarose pads prepared  
343 in H<sub>2</sub>O and formed on a microscope slide. Next, animals were immobilized on the pad using 6  
344  $\mu$ L of PolySciences 0.05  $\mu$ m polystyrene microspheres or 25  $\mu$ M tetramisole and covered with  
345 a glass coverslip. Immediately afterward, animals were imaged using an inverted Zeiss  
346 LSM800 laser-scanning confocal microscope with 40x or 63x oil immersion objectives. The  
347 488 nm and 561 nm lasers were used for excitation of GFP and RFP fluorescent proteins,  
348 respectively. Z-stacks, which covered the whole animal, were taken and the number of  
349 exophers released by muscles was counted. Finally, data were normalized to the average  
350 number of exophers present in control animals and compared between conditions.

351 For scoring exophers with the stereomicroscope, we used Leica M165FC stereomicroscope  
352 equipped with Leica EL6000 lamp and standard Texas Red and GFP filter sets. Age  
353 synchronized, freely moving, day-2 adult animals were directly visualized on culturing NGM  
354 plates and the number of visible exophers released by muscles were counted. Finally, data were

355 normalized to the average number of exophers present in control animals and compared  
356 between conditions.

357 Representative pictures of exophers presented in the manuscript were taken with the usage of  
358 an inverted Zeiss 700 laser-scanning confocal microscope equipped with a 40x oil objective.  
359 The 488 nm and 555 nm lasers were used for excitation of GFP and RFP fluorescent proteins,  
360 respectively. To investigate the presence and distribution of exophers, z-stacks were taken and  
361 processed with ZEN software.

362

### 363 **RNA interference**

364 RNA interference in *C. elegans* was performed using the standard RNAi feeding method and  
365 RNAi clones<sup>7</sup>. For experiments, we used NGM plates supplemented with 1 mM IPTG and 25  
366 µg/µl carbenicillin seeded with HT115 *E. coli* bacteria expressing double-stranded RNA  
367 (dsRNA) against the gene of interest or, as a control, with bacteria without a vector. Worms  
368 were placed on freshly prepared RNAi plates, either as age-synchronized pretzel-stage eggs,  
369 L1 larvae, or L4 larvae. The number of exophers was counted on day 2 adult worms using a  
370 confocal microscope or a stereomicroscope.

371

### 372 **Stress influence on exophers production**

373 Worms were age-synchronized using alkaline hypochlorite solution (bleaching procedure), as  
374 previously described<sup>8</sup>. The harvested eggs were incubated overnight at 16 °C for hatching.  
375 Approx. 1000 L1 larvae were transferred on NGM plates and incubated at 20 °C till they  
376 reached day-2 of adulthood. The worms were further channeled to the respective stress  
377 treatments.

378 Oxidative stress

379    Approx. 100, day-2 adult worms were washed-off from the NGM plates and rinsed 3 times  
380    with M9 buffer. The worms to be stressed were suspended in 1 ml of 5 mM hydrogen peroxide  
381    solution prepared in M9 buffer, whereas control worms were suspended in M9 buffer. The  
382    tubes were incubated on a shaker at 20 °C for 60 minutes.

383    Heat stress

384    Similarly, approx. 100, day-2 adult worms were washed-off from NGM plates and rinsed 3  
385    times with M9 buffer. The worms were further suspended in a 1 ml M9 buffer. The worms to  
386    be heat stressed were incubated in a shaker at 33 °C for 60 minutes, whereas the control animals  
387    were incubated at 20 °C for 60 minutes.

388    Exophers quantification

389    From each stress/control treatment, 30 worms were picked onto agarose pad slides individually  
390    for the quantification of exophers. Exophers were quantified using a confocal microscope.  
391    Obtained data were normalized to the average number of exophers present in control animals  
392    and compared between conditions.

393

394    **Number of exophers on consecutive days**

395    For each biological replicate, 30 L4 larvae hermaphrodites or 50 L4 larvae males were  
396    transferred to fresh NGM plates (5 hermaphrodites or 10 males per plate). For the next  
397    consecutive 15 days, the number of exophers in each animal was counted using a  
398    stereomicroscope. Hermaphrodites were transferred to fresh plates every 2 – 3 days. Males  
399    were kept on the same plate until the end of the experiment. All animals that died during the  
400    experiment time course were removed from the plate.

401

402    **Measuring exophers in *fem-1* mutant**

403    Approx. 50 L1 larvae from *fem-1(hc17)ts* mutant strain expressing GFP in BWM were  
404    transferred to 2 fresh NGM plates. During the time course of the experiment, one of the plates  
405    was kept at 15 °C while the second one was kept at 25 °C. When worms reached L4 larval  
406    stage, each worm was transferred to a separate plate and grown at the same temperature as  
407    before. After 48 hours at 25 °C or 72 hours at 15 °C, using a stereomicroscope, a number of  
408    exophers released from worms muscles was counted and plates were scored for F1 offspring  
409    to assign all worms as fertile or infertile.

410

#### 411    **FUdR assay**

412    Age-synchronized animals were placed on NGM plates seeded with OP50 *E. coli* bacteria as a  
413    food source until they reached young adulthood (day 0). Next, animals were selected and  
414    moved to test plates containing 25 µM fluorodeoxyuridine (FUdR) to prevent embryonic  
415    development and egg hatching<sup>9</sup> or control plates without FUdR. The number of exophers was  
416    counted on adult day-2 using confocal microscopy.

417

#### 418    **Exophers and *in utero* eggs correlation**

419    For correlating the number of exophers with the number of eggs present in worms uterus, 1 to  
420    3-days old animals were used. First, muscular exophers for a single worm were counted using  
421    the stereomicroscope. Next, worm was transferred to a 10 µl drop of 1.8 % hypochlorite  
422    solution put on a microscope slide. Finally, after approx. 5 minutes when the hermaphrodite  
423    mother was fully bleached, the number of eggs released from worm's uterus was counted. Data  
424    analysis was performed using GraphPad Prism 8 software.

425

#### 426    **Starvation assay**

427 To assess the influence of worms starvation on the exophers production, day-2 adult worms  
428 were moved to bacteria-free NGM plates. After 24 hours of food deprivation, the number of  
429 exophers was counted using a stereomicroscope. As a control, day-3 adult worms grown for  
430 the whole time on NGM plates seeded with bacteria were used. Obtained data were normalized  
431 to the average number of exophers present in control animals and compared between  
432 conditions.

433

#### 434 **Eggs lysate assay**

435 To obtain eggs, age-synchronized N2 gravid hermaphrodites were bleached using an alkaline  
436 hypochlorite solution. Harvested eggs were suspended in appropriate volume of M9 buffer to  
437 reach the concentration of approx. 200 eggs per  $\mu\text{l}$ . Next, eggs were flash-frozen in liquid  
438 nitrogen, thawed on ice, and sonicated 3 times for 10 seconds to obtain eggs lysate. 150  $\mu\text{l}$  of  
439 eggs lysate was mixed with 150  $\mu\text{l}$  of concentrated OP50 *E. coli* bacteria and placed in a 0.5  
440 ml Eppendorf tube. Approx. 30 day-1 young adult hermaphrodites were transferred to  
441 Eppendorf tube containing a mixture of eggs lysate and bacteria and were placed on the rotator  
442 for 2 hours at room temperature. After 2 hours, the content of the tube was placed on the fresh  
443 NGM plate seeded with OP50 bacteria. 18 hours later the number of exophers in each worm  
444 was counted. For control animals, the whole protocol was the same except that for bleaching  
445 step no worms were used.

446

#### 447 **Worm exploratory behaviour**

448 Age-synchronized, day-2 adult worms which had an average (6-8), few (< 2), or many (> 20)  
449 exophers were sorted to separate NGM plates. Approximately 10 worms per replicate were  
450 brought onto NGM plates and the worm movement was recorded for 2 minutes using the  
451 WormLab system (MBF Bioscience). The frame rate, exposure time, and gain were set to 7.5

452 frames per second, 0.0031 s, and 1, respectively. The track length, straight-line distance, center  
453 point speed, and the overall track pattern of individual worms were analyzed using the  
454 WormLab software (MBF Bioscience).

455

#### 456 **Lifespan assay**

457 For each biological replicate, approx. 300 late L4 larvae were transferred to fresh NGM plate.  
458 On day 2 of worms' adulthood, the number of exophers in each animal was counted and worms  
459 with less than 2 or more than 20 visible exophers were transferred to new plates (25 – 30  
460 animals). Additional 25 – 30 worms were picked blindly from the same original population,  
461 moved to a fresh plate, and served as a control. Lifespan measurements were performed on  
462 these three respective populations. During lifespan measurements, worms were scored daily  
463 for movement and pharyngeal pumping until their death. All worms were moved to fresh plates  
464 every 1 – 2 days during the eggs-laying period and every 3 – 5 days afterward. Animals that  
465 crawled off the plate or exhibited baggy phenotype were censored from the experiment. Data  
466 analysis was performed using GraphPad Prism 8 software.

467

#### 468 **Vitellogenin levels in embryos**

469 Vitellogenin levels in embryos were measured based on the GFP signal from fluorescently  
470 tagged VIT-2 protein. Approx. 200 late L4 larvae were transferred to fresh NGM plate. On day  
471 2 of worms adulthood, the number of exophers in each animal was counted and worms with  
472 less than 2 or more than 20 visible exophers were transferred to new plates. Next, animals from  
473 each group were individually transferred to a 10  $\mu$ l drop of M9 buffer which was placed on a  
474 microscope slide. Using a sharp injection needle, worm was cut open to release eggs from the  
475 uterus. Fluorescent signal from 2-cell embryo stage was captured using Leica M165FC  
476 stereomicroscope equipped with Leica EL6000 lamp, standard GFP filter set, and Leica

477 DFC365 FX CCD camera. Magnification used for recording pictures was set to 192x. Exposure  
478 time and gain were set to 600 ms and 2, respectively. The fluorescent signal was quantified  
479 using Leica Las X software and was normalized to the average signal from eggs, which were  
480 obtained from animals with less than 2 exophers.

481

#### 482 **Worms development assay**

483 25 – 30 age-synchronized, day-2 adult worms which had an average (6-8), few (< 2), or many  
484 (> 20) exophers were sorted to separate NGM plates. Gravid adults were allowed to lay eggs  
485 for 4 hours, afterward removed from the plates, and the development of their offspring was  
486 followed. 46 hours later, using the stereomicroscope, developmental stage of each animal was  
487 checked, and the proportion between L4 larvae stage worms and young adult worms was  
488 calculated.

489

#### 490 **Statistical analysis**

491 Statistical tests used in this study were two-tailed Welch's t-test, one-tailed Welch's t-test, Log-  
492 rank (Mantel-Cox) test, and Fisher's exact test. P-value < 0.05 was considered significant.

493

#### 494 **Methods references**

- 495 1. Brenner, S. The genetics of *Caenorhabditis elegans*. *Genetics* **77**, 71–94 (1974).
- 496 2. Zhang, Y., Werling, U. & Edelman, W. SLiCE: a novel bacterial cell extract-based  
497 DNA cloning method. *Nucleic Acids Res.* **40**, e55–e55 (2012).
- 498 3. Redemann, S. *et al.* Codon adaptation-based control of protein expression in *C.*  
499 *elegans*. *Nat. Methods* **8**, 250–252 (2011).
- 500 4. Watanabe, S. *et al.* Protein localization in electron micrographs using fluorescence

- 501 nanoscopy. *Nat. Methods* **8**, 80–84 (2011).
- 502 5. El Mouridi, S. *et al.* Reliable CRISPR/Cas9 Genome Engineering in  
503 &lt;em>Caenorhabditis elegans</em>; Using a Single Efficient sgRNA and  
504 an Easily Recognizable Phenotype. *G3 Genes|Genomes|Genetics* **7**, 1429 LP – 1437  
505 (2017).
- 506 6. Praitis, V., Casey, E., Collar, D. & Austin, J. Creation of low-copy integrated  
507 transgenic lines in *Caenorhabditis elegans*. *Genetics* **157**, 1217–1226 (2001).
- 508 7. Kamath, R. S. & Ahringer, J. Genome-wide RNAi screening in *Caenorhabditis*  
509 *elegans*. *Methods* **30**, 313–321 (2003).
- 510 8. Porta-de-la-Riva, M., Fontrodona, L., Villanueva, A. & Cerón, J. Basic *Caenorhabditis*  
511 *elegans* methods: synchronization and observation. *J. Vis. Exp.* e4019–e4019 (2012).  
512 doi:10.3791/4019
- 513 9. Mitchell, D. H., Stiles, J. W., Santelli, J. & Sanadi, D. R. Synchronous Growth and  
514 Aging of *Caenorhabditis elegans* in the Presence of Fluorodeoxyuridine<sup>1</sup>. *J. Gerontol.*  
515 **34**, 28–36 (1979).

516

## 517 **Acknowledgements**

518 We thank the *Caenorhabditis* Genetics Center (funded by the NIH National Center for Research  
519 Resources, P40 OD010440) for strains; T. Hoppe for expert advice and Carl Kutzner for RNAi  
520 clones; T. Wegierski for confocal microscopy assistance; B. Uszczyńska-Ratajczak, K.  
521 Szczepanowska, H. Bringmann, and members of Chacińska and Pokrzywa laboratories for  
522 discussions and comments on the manuscript.

523

524



525 **Funding**

526 Work in the W.P. laboratory was supported by the Foundation for Polish Science co-financed  
527 by the European Union under the European Regional Development Fund (grant  
528 POIR.04.04.00-00-5EAB/18-00 to W.P.), the European Molecular Biology Organization  
529 (EMBO Installation Grant No. 3916 to M.P., K.K., and W.P.), the Polish National Science  
530 Center (grant UMO-2016/23/B/NZ3/00753 to N.S. and W.P.), and the Deutsche  
531 Forschungsgemeinschaft (DFG FOR 2743 to W.P.). Work in the A.C. laboratory was funded  
532 by "Regenerative Mechanisms for Health" project MAB/2017/2 (M.T. and A.C.) carried out  
533 within the International Research Agendas programme of the Foundation for Polish Science  
534 co-financed by the European Union under the European Regional Development Fund and was  
535 supported by a POLONEZ Fellowship of National Science Centre, Poland,  
536 2016/21/P/NZ3/03891 (M.T.), within European Union's Horizon 2020 research and innovation  
537 programme under the Marie Skłodowska-Curie grant agreement no. 665778.

538

539 **Author contributions**

540 M.T., W.P., M.P., N.S., M.N., and K.K. conducted and designed experiments, M.T. and W.P.  
541 conceived the project and supervised the study. W.P., A.C. and M.T. secured the funding. W.P.  
542 and M.T. wrote the manuscript with input from A.C. and M.P.

543

544 **Author Information**

545 The authors declare no competing financial interests. Correspondence and requests for  
546 materials should be addressed to M.T., ([m.turek@cent.uw.edu.pl](mailto:m.turek@cent.uw.edu.pl)) and W.P.  
547 ([wpokrzywa@iimcb.gov.pl](mailto:wpokrzywa@iimcb.gov.pl)).

548

549

550 **Supplementary Information**

551 Supplementary Video 1

552 The video shows the cellular content being transfer from BWM cell to exopher via elastic tube.

553 Supplementary Table 1

554 The file contains a table with the list of all *C. elegans* strains used in this study.

555 Supplementary Table 2

556 The file contains a table with the statistical summary of lifespan experiments

557

558
