# Supplementary material for: Nutritional status and fecundity are synchronised by muscular exopheresis
Source: bioRxiv or medRxiv preprint supplement (doi:10.1101/2020.06.17.157230), 2020-11-14
Supplement: Supplementary file [file media-1.pdf]

**Supplementary Table 1. List of all *C. elegans* strains used in this study**

| Strain | Genotype                                                                                                                                                                         | Usage                                                            | Reference                |
|--------|----------------------------------------------------------------------------------------------------------------------------------------------------------------------------------|------------------------------------------------------------------|--------------------------|
| N2     | Wild type                                                                                                                                                                        | Fig. 3e                                                          | Brenner 1974             |
| ACH91  | <i>wacIs6[myo-3p::pas-7::GGGGS Linker-wrmScarlet::unc-54 3'UTR, unc-119(+)], wacIs14[myo-3p::tomm-20_1-50aa::attB5::mGFP::unc-54-3'UTR, unc-119(+)]</i>                          | Fig. 1a,g; Fig. 3f; Fig. 4f                                      | Generated for this study |
| ACH93  | <i>wacIs1[myo-3 promoter::rpn-5 CAI=0.97::GGGGS Linker-wrmScarlet::unc-54 3'UTR, unc-119(+)], wacIs14[myo-3 promoter::tomm-20_1-50aa::attB5::mGFP::unc-54-3'UTR, unc-119(+)]</i> | Fig. 1a-f; Fig. 2a, d-e; Fig. 3a-b, e; Fig. 4b-e, i; Supp. Fig 1 | Generated for this study |
| ACH199 | <i>wacIs1[myo-3 promoter::rpn-5 CAI=0.97::GGGGS Linker-wrmScarlet::unc-54 3'UTR, unc-119(+)], vit-2(crg9070[vit-2::gfp]) X</i>                                                   | Fig. 4g-h, Supp. Fig. 2                                          | Generated for this study |
| AGD885 | <i>rrf-3(b26) II; fem-1(hc17) IV; uthEx633 [myo-3p::GFP]</i>                                                                                                                     | Fig. 2b-c                                                        | Vilchez et al. 2012      |
| SJ4103 | <i>zcls14 [myo-3::GFP(mit)]</i>                                                                                                                                                  | Fig. 3c                                                          | Benedetti et al. 2006    |
