# Supplementary material for: Nutritional status and fecundity are synchronised by muscular exopheresis
Source: bioRxiv or medRxiv preprint supplement (doi:10.1101/2020.06.17.157230), 2020-11-14
Supplement: Supplementary file [file media-2.pdf]

**Supplementary Table 2. Statistical summary of lifespan experiments**

| Figure 4e | Condition     | Median lifespan (Days) | % increase median lifespan | Log rank P-value | Total animals died (Total) |
|-----------|---------------|------------------------|----------------------------|------------------|----------------------------|
| Exp. 1    | Control       | 16.50                  |                            |                  | 26 (30)                    |
|           | Few exophers  | 16.50                  | 0.00                       | 0.800            | 24 (29)                    |
|           | Many exophers | 17.00                  | 3.03                       | 0.400            | 12 (17)                    |
| Exp. 2    | Control       | 14.50                  |                            |                  | 20 (27)                    |
|           | Few exophers  | 16.00                  | 10.34                      | 0.760            | 12 (19)                    |
|           | Many exophers | 19.50                  | 34.48                      | 0.042            | 16 (20)                    |
| Exp. 3    | Control       | 18.00                  |                            |                  | 25 (31)                    |
|           | Few exophers  | 17.00                  | -5.56                      | 0.920            | 21 (24)                    |
|           | Many exophers | 20.00                  | 11.11                      | 0.0005           | 18 (26)                    |
| All       | Control       | 16.00                  |                            |                  | 71 (88)                    |
|           | Few exophers  | 17.00                  | 6.20                       | 0.813            | 57 (72)                    |
|           | Many exophers | 19.00                  | 18.80                      | 0.0017           | 46 (63)                    |
